1 **Short title:** Patterns of taxonomic, functional and phylogenetic  $\beta$ -diversity variation of  
2 Neotropical small mammals

3

4 **Exploring patterns of taxonomic, functional and phylogenetic  $\beta$ -diversity variation**  
5 **of Neotropical small mammals in a highly fragmented landscape**

6

7

8 Wellington Hannibal<sup>1, \*</sup>, Nicolay Leme da Cunha<sup>2</sup>

9

10 <sup>1</sup>Laboratório de Ecologia e Biogeografia de Mamíferos, Universidade Estadual de  
11 Goiás, Quirinópolis, Goiás, Brazil

12 <sup>2</sup>Grupo de Ecología de la Polinización, INIBIOMA, CONICET-Universidad Nacional  
13 del Comahue, San Carlos de Bariloche, Río Negro, Argentina

14

15 \* Corresponding author

16 E-mail: wellingtonhannibal@gmail.com (WH)

17

18 Competing interests: The authors have declared that no competing interests exist.

19

## 20 **Abstract**

21 Diversity can be partitioned in several components and dimensions that are affected in  
22 different ways by habitat loss and fragmentation. However, these partitions and  
23 dimensions are rarely investigated on human-modified landscapes. In this study, we  
24 investigated different partitions (Hill numbers) and dimensions (taxonomic [T $\beta$ D],  
25 functional [F $\beta$ D] and phylogenetic [P $\beta$ D]) of small mammal  $\beta$ -diversity in a fragmented  
26 landscape of central Brazil using a multi-scale approach. T $\beta$ D was estimated  
27 considering rare, common and abundant species. Tolerance to disturbed habitat,  
28 assessed via the traits “habitat use”, “tail length” and “use of vertical strata”, and trophic  
29 guild, defined by the “diet”, were used to estimate F $\beta$ D. P $\beta$ D was based on phylogenetic  
30 relatedness of the sampled species. The association between different partitions and  
31 dimensions of  $\beta$ -diversity with habitat and landscape attributes were investigated using  
32 Mantel tests. We found a significant positive effect of geographical distance on all  
33 partitions and dimensions of  $\beta$ -diversity. NDVI was the second most important variable  
34 affecting abundance based T $\beta$ D, and all phylogenetic and functional  $\beta$ -diversity  
35 dimensions. Habitat characteristics, such as fallen logs and canopy cover were  
36 positively associated with all  $\beta$ -diversity dimensions. Our findings support the  
37 hypothesis that even in a highly modified landscape, small mammal’s  $\beta$ -diversity is  
38 determined by different environmental factors and spatial disposition of forest patches.  
39 However, the relatively higher importance of space appears to be related to dispersal  
40 limitation of this group.

41 **Keywords:** abundance; geographical distance; NDVI; vegetation structure

## 42 **Introduction**

43 Biological diversity is a topic of great interest for biologists and can have different  
44 connotations [1,2]. There are several ways to describe biological diversity, and among  
45 them the definition of three main components: alpha diversity ( $\alpha$ ) - diversity on a local  
46 scale, beta diversity ( $\beta$ ) - the variation of species between locations, and gamma  
47 diversity ( $\gamma$ ) - diversity on a regional scale [3] have been largely employed.  
48 Nevertheless, the traditional definition of  $\beta$ -diversity is dependent on  $\alpha$ -diversity [3,4],  
49 leading to spurious results when researchers compare  $\beta$ -values of regions with different  
50  $\alpha$ -diversities [5]. Therefore, to avoid misinterpretation,  $\alpha$  and  $\beta$  components should be  
51 ideally transformed into their number equivalents [6,7]; for example  ${}^qD_\beta$  for  $\beta$ -diversity,  
52 where  $q$ -number could determine a diversity measure's sensitivity to rare or common  
53 species [5,8]. In this approach, species richness, Hill-Shannon diversity and Hill-  
54 Simpson diversity [6] are the three forms of Hill diversity most commonly used in  
55 ecological studies [8] and are generally known as the "Hill numbers".

56 In a community dynamic viewpoint,  $\beta$ -diversity increases (heterogenization)  
57 when common species do not co-occur from some or all sites, or when new species  
58 arrive at some sites; and  $\beta$ -diversity decrease (homogenization) when rare, non-common  
59 species become extinct, or when formerly rare or absent species become widespread [9].  
60 Variation on the trajectory of  $\beta$ -diversity can be caused by different effects of human  
61 disturbance [9–11]. Between these human disturbances, habitat loss has a consistently  
62 negative effect on biodiversity, while habitat fragmentation has been associated with the  
63 concept of habitat spatial heterogeneity, generally considered to have a positive  
64 influence on population and community-level ecological response [12,13]. In this

65 scenario of habitat fragmentation,  $\beta$ -diversity should increase due mainly the effects of  
66 environmental variation among patches.

67         Nonetheless, the accrued evidence showed that the patterns of  $\beta$ -diversity in  
68 fragmented landscapes can result in homogenization or differentiation depending on the  
69 landscape heterogeneity and the spatial scale of analysis [14–17], highlighting the  
70 importance of isolation by distance on determining patterns of  $\beta$ -diversity variation  
71 [18]. Functional and phylogenetic  $\beta$ -diversity have been relatively less investigated on  
72 fragmented landscapes when compared to traditional taxonomic metrics [19], but  
73 despite less used, some studies show that a decrease in such dimensions of  $\beta$ -diversity  
74 was associated with land use intensification [20,21]. On the other hand, in a gradient of  
75 habitat complexity, the increase of all dimensions of  $\beta$ -diversity can be driven by  $\beta$ -  
76 replacement (T $\beta$ D and F $\beta$ D) or  $\beta$ -richness (P $\beta$ D) [22]. So, ecological drives of  
77 biodiversity can differ among different biotas, scales and diversity facets [23]. Thus,  
78 decomposition of biodiversity into different dimensions may allow the identification of  
79 the main aspects of communities that are affected by forest conversion and  
80 fragmentation [24]. Therefore, in the abovementioned examples, habitat loss and  
81 fragmentation can lead to contrasting effects on  $\beta$ -diversity depending on the scale and  
82 dimension investigated.

83         Previous studies in the Neotropical region have shown that small mammals are  
84 good model organisms for testing the influence of landscape heterogeneity and habitat  
85 complexity on community ecology [25–30]. However, studies conducted in a multi-  
86 scale approach pointed contrasting scale-effects on small mammal  $\beta$ -diversity. For  
87 instance, in an Atlantic Forest fragmented landscape, small mammal  $\beta$ -diversity  
88 increased in small and isolated fragments [25], whereas, in Amazonian land-bridge  
89 islands, small mammal  $\beta$ -diversity was more strongly related to environmental variation

90 (habitat quality) among sites than to spatial distance, patch scale and landscape scale  
91 [31]; further, in this ecoregion, all dimension of  $\beta$ -replacement decreased, while  $\beta$ -  
92 richness increased with forest area [32]. In the Brazilian Savanna, spatial configuration  
93 of the landscape and the extent, and quality of habitat strongly influence the rate of  
94 species turnover [30]. So, there is no consensus of the effects of landscape variation on  
95 structuring the Neotropical small mammals  $\beta$ -diversity, clearly demonstrating the need  
96 of further studies exploring different community dimensions to better understand the  
97 effects of habitat fragmentation on this important group of vertebrates.

98           In this study, we evaluated the response of species richness, Shannon's entropy  
99 and Simpson's dominance on T $\beta$ D (multiplicative partitioning of Hill numbers) [5] to  
100 understand the relative importance of rare and dominant species on determining patterns  
101 of  $\beta$ -diversity in a highly fragmented landscape. We also investigated which are the  
102 main predictors of habitat (local) and landscape (regional) scales affecting the partitions  
103 of taxonomic, functional and phylogenetic  $\beta$ -diversity. Dispersal ability and habitat  
104 selectivity have been described as the main processes related to change on species  
105 composition [28], functional structure [29] and species turnover [30] of small mammal  
106 community in highly fragmented landscapes. Considering the relative low dispersal  
107 ability of small mammals [33–35], and the effect of habitat and landscape scale on  
108 structuring small mammal composition in Neotropical region [26,28,30,31], we would  
109 expect a positive effect of space, habitat and landscape quality on influencing all  
110 partitions and dimensions of  $\beta$ -diversity.

111

## 112 **Materials and Methods**

### 113 **Study area**

114 The study was conducted in southern Goiás State, central Brazil (18°25' – 18°43' S,  
115 50°48' – 50°22' [28]), a highly fragmented landscape with about 13% of forest cover  
116 (<https://mapbiomas.org/>), dominated by semi-deciduous forest connected to riparian  
117 forest in a transitional region between Atlantic Forest and Cerrado ecoregion [36]. The  
118 climate is Tropical semi-humid - Aw (Köppen) with markedly dry season (April to  
119 September) and wet season (October to March), and mean annual temperature and mean  
120 annual rainfall around 23 °C and 1600-1900 mm, respectively [37].

121

### 122 **Sampling design**

123 The sampling was carried out between January and December 2015. We captured small  
124 mammals, and quantified the vegetation structure and food resources in 24 trapping  
125 grids, distant 0.5 to 1 km within the same patch. Each trapping grid was composed of 20  
126 trap stations, representing an area of 45 x 60 m (see, [28] for details about trapping  
127 grids). For landscape characterization, we estimated landscape metrics in 13 buffers of 1  
128 km radius from the edge of sampled forest patches. The average forest patch size was  
129 84.1 ha, with the smallest patch with 39.5 ha and the largest one with 142 ha. The  
130 average Euclidean distance among them was 22,588 m, being the closest distant 389 m  
131 and the farthest 51,978 m.

132

## 133 **Small mammal surveys**

134 We captured small mammals using live traps (wire-cage traps and Sherman traps) and  
135 pitfall traps. We set Sherman and wire-cage traps in 16 trap-stations arranged in four  
136 linear transects, with 15-m intervals between the nearest trap stations. Each trap-station  
137 was composed by one wire-cage and one Sherman trap disposed on ground and  
138 understory (1.5 to 2 m height), alternatively. Pitfall traps was arranged in a  
139 perpendicular transect distant 15 m of each live trapping-grid, composed by four  
140 buckets (30 liters) connected by a fence of 0.8 m height (see, [28] for methodological  
141 detail). We made the captures under the collection license SISBIO n° 46985-1 and in  
142 accordance with guidelines provided by the American Society of Mammalogists [38].

143

## 144 **Habitat and landscape characterization**

145 We used 23 variables to describe habitat and landscape characterization (S1 Data). For  
146 habitat characterization, we measured six variables related to vegetation structure  
147 (numbers of trees, shrubs, lianas, fallen logs, canopy cover and litter cover) and two  
148 variables that depict food resource availability (arthropods and fruits and seeds  
149 composition) in 10 selected trap stations of each trapping grid. We reduced the  
150 dimensionality of food resource availability using a Principal Coordinates Analysis  
151 (PCoA) separately for the matrix of arthropods and fruits-seeds resources. We  
152 associated the both matrices with the “horn” dissimilarity index, the one that presented  
153 higher variance recovery in relation to the original distances. As for the patch scale, we  
154 used four variables (i.e., forest area, core area, perimeter and NDVI), whereas for  
155 landscape scale, we used nine variables (i.e., mean isolation, water distance, shannon  
156 diversity, shape, mean perimeter area, core area, index core area, total edge and

157 connectivity). The attributes related to patch and landscape scales were obtained via  
158 satellite images (methodological details can be found in [28]).

159

## 160 **Functional traits and phylogeny building**

161 We selected four functional traits associated with tolerance to habitat disturbance: 1)  
162 habitat use [nominal trait: generalist or forest specialist], 2) tail length [quantitative trait  
163 in mm: arboreal species tend to be long tailed], 3) understory use [quantitative trait in  
164 %: based on the percentage of capture in the understory]; and trophic guild: 4) diet  
165 [multi-choice: insectivore, frugivore, granivore and omnivore, according to Annotated  
166 Checklist of Brazilian Mammals [41] (see, [29] for functional traits interpretation  
167 details). Traits were measured in the field from captured specimens or obtained from the  
168 literature [26,39–42].

169 We derived a phylogeny for our data set using the VertLife.org phylogeny subset  
170 on-line tool. We used as backbone the "Mammal's birth-death node-dated completed  
171 trees (all 5911 species, set of 10k trees)" tree. Despite the criticisms regarding the use of  
172 synthesis-based phylogenies in evolutionary community studies, mostly because the  
173 relative low resolution and higher number of polytomies [43,44] demonstrated that this  
174 method of generating phylogenetic trees is sufficiently robust for community  
175 phylogenetic analysis.

176

## 177 **Data analysis**

178 We initially tested for multicollinearity among all the 23 predictor variables described  
179 above using the Variance Inflation Factor (VIF) approach. For this, we used a stepwise



180 procedure, where all data set was tested for collinearity, and when a variable showed  
181 VIF value above the threshold of 10, it was excluded and the procedure repeated with  
182 remaining variables until no variable was excluded. After such procedure, a total of 15  
183 variables remained to be used as predictors in our models (S1 Table).

184 We used various distance-based metrics at the taxonomic, functional and  
185 phylogenetic dimensions to test for variation of  $\beta$ -diversity along the predictor variables  
186 selected above. For the taxonomic dimension, we partition the diversity of the  
187 metacommunity into  $\beta$ -components weighting different orders of diversity: species  
188 richness [ $q = 0$ ], Shannon's diversity [ $q = 1$ ] and Simpson's dominance [ $q = 2$ ] (Hill  
189 numbers, [5-7]). For each Hill number, we did such partition for each pair of grids; thus,  
190 we estimate the  $\beta$ -diversity variation among all possible pairs of grids to generate a  
191 distance-based triangular matrix of  $\beta$ -diversity.

192 As for the functional dimension, we associated each pair of species by the eight  
193 continuous traits using the "Gower" distance. We then used this distance-based  
194 triangular matrix to estimate the Rao's quadratic entropy [45], a measure of diversity in  
195 ecological communities accounting for species differences (functional or phylogenetic).  
196 We estimate two metrics of F $\beta$ D: D<sub>kl</sub>, which is the pairwise functional distance, and H,  
197 which is the D<sub>kl</sub> standardized to account for within-community diversity. Both metrics  
198 return distance-based triangular matrix of F $\beta$ D among pair of grids. For the  
199 phylogenetic dimension, we used the phylogenetic relationship of the captured species  
200 of small mammals to calculated the mean phylogenetic distance among all pairwise  
201 combinations of species co-occurring in a sample (MPD), which is a basal measure of  
202 the phylogenetic relatedness, and phylogenetic distance between each species and its  
203 nearest neighbor on the phylogenetic tree (MNTD), which is can be interpreted as a  
204 terminal metric of the phylogenetic relatedness of co-occurring species [46,47].

205 To test the association between each of the explanatory variables with the  
206 different dimensions of  $\beta$ -diversity, we used Mantel tests with 9999 permutations. For  
207 this, we used each of the  $\beta$ -diversity distance based on the triangular matrix as a  
208 response matrix, and a Euclidean distance-based on a matrix associating each sample  
209 unit by each predictor as a predictor matrix. We have also used a triangular matrix based  
210 on the Euclidean distance among grids to test for spatial autocorrelation. Moreover,  
211 given that our dataset is composed by 13 forest patches, being 12 of them with two  
212 grids, for testing the effect of the landscape metrics, we sampled one trapping grid per  
213 forest patch, thus reducing the number of sampling units to 13 to avoid pseudo-  
214 replication at a landscape scale. In the end, we did a total of 16 mantel tests for each  $\beta$ -  
215 diversity dimension described above. Finally, we tested for the spatial autocorrelation of  
216 each of the 15 predictor variables, and whenever we found an association between a  $\beta$ -  
217 diversity metric and any metric spatial autocorrelated, we did partial mantel tests in  
218 order to account for any potential confounding effect between explanatory variables.

219 We did all our analyses and graphics in R version 4.0.5 [48]. For calculating  
220 the VIF we used the package "*usdm*" [49]. To calculate the pairwise  $\beta$ -diversity at the  
221 taxonomic level, we used the function "*DivPart*" of the package "*entropart*" [50]. To  
222 associate our functional matrix based on "Gower" distance, we used the function  
223 "*vegdist*", and to perform the Mantel tests, we used the "*mantel*" function, both from the  
224 package "*vegan*" [51]. To estimate the Rao's quadratic entropy, we used the function  
225 "*raoD*", and to calculate "MPD" and "MNTD" we used the functions "*mpd*" and "*mntd*",  
226 respectively, all from the "*picante*" package [52].

227

## 228 **Results**

### 229 **Small-mammal diversity**

230 With an effort of 12,096 trap-night, we had 624 captures, resulting in a trap success of  
231 5.2%. We captured 408 individuals (mean  $\pm$  standard deviation (SD),  $16.67 \pm 8.76$   
232 individuals per trapping grid), belonging to 12 small mammal species ( $4.58 \pm 1.50$   
233 species per trapping grid). The most common species were the arboreal marsupial  
234 *Gracilinanus agilis* (124 individuals, 20 trapping grids); the arboreal rodents  
235 *Rhipidomys macrurus* (55, 14), *Oecomys bicolor* (52, 16) and *Oecomys catherinae* (27,  
236 6); the scansorial marsupials *Didelphis albiventris* (49, 20) and *Marmosa murina* (28,  
237 8); and the terrestrial rodent *Calomys expulsus* (55, 13), comprising 96.1% of all  
238 individuals captured. The rarest species represented by less than 20 individuals were the  
239 terrestrial rodent *Calomys tener* (6 individuals, 4 trapping grid); the scansorial  
240 marsupial *Cryptonanus chacoensis* (5, 4); the scansorial rodent *Oligoryzomys*  
241 *matogrossae* (2, 2); the terrestrial marsupial *Monodelphis kunsi* (2, 2); and the arboreal  
242 marsupial *Caluromys philander* (1, 1).

243

### 244 **Explanatory variables variation**

245 For habitat characterization – vegetation structure and food resource availability, we  
246 found the following amplitude variation: “no. of shrubs” (min = 62, max = 1027), “no.  
247 of lianas” (min = 86, max = 418), “no. of fallen logs” (min = 3, max = 58), “canopy  
248 cover” (min = 41%, max = 98%) and “litter cover” (min = 85%, max = 99%). We  
249 considered the first two PCoA axes obtained from “arthropods” resource matrix

250 (variance recovery,  $r^2 = 0.85$ ), and the first two PCoA axes from the “fruit-seed”  
251 resource matrix ( $r^2 = 0.87$ ) to represent “food resource availability” (S2 Table).  
252 Landscape characterization was based on patch and landscape metrics, according to  
253 following amplitude variation parameters: “forest area of focal patch” (min = 39.6, max  
254 = 142.3 ha), “perimeter length of focal patch” (min = 2749, max = 21136 m), “NDVI”  
255 (min = 0.2800, max = 0.3370), “patch isolation” (min = 99, max = 4102 m), “water  
256 distance” (min = 171.6, max = 1258.4 m) and “total edge of landscape” (min = 6410,  
257 max = 60766 m). Average values for all variables patch and landscape variables can be  
258 found elsewhere (S2 Table). Within the 15 predictor variables, we have only found  
259 evidence that “forest area” was spatially autocorrelated (Mantel test,  $r = 0.48$ ,  $p <$   
260  $0.001$ ). All other variables showed no signal of spatial structure (S3 Table).

261

## 262 **Functional and phylogenetic variation**

263 The small mammal community represented a range of different ecological traits, seven  
264 species were classified as habitat generalist (e.g., marsupials [*C. chacoensis*, *D.*  
265 *albiventris*, *G. agilis* and *M. kunsi*] and rodents [*C. expulsus*, *C. tener*, *O.*  
266 *mattogrossae*]), and five species were forest specialist (marsupials [*C. philander* and *M.*  
267 *murina*] and rodents [*O. bicolor*, *O. catherinae* and *R. macrurus*]). In relation to tail  
268 length, the shorter and longer tails were found in the terrestrial *M. kunsi* (36.1 mm) and  
269 scansorial *D. albiventris* (297.8 mm) marsupials, respectively. Thus, tail length of  
270 marsupials ranged from 36.1 to 297.8 (mean  $\pm$  SD,  $156 \pm 87.8$  mm), while the tail  
271 length of rodents ranged from 58.6 to 148.2 ( $96.8 \pm 34.3$  mm). The use of understory  
272 ranged from 0 (*M. kunsi*, *C. expulsus*, *C. tener* and *O. mattogrossae*) to 100% (*C.*  
273 *philander*), with little variation within each small mammal group (marsupials: min = 0,

274 max = 100,  $52.3 \pm 41.7$ ; rodents: min = 0, max = 93.1,  $42.2 \pm 47$  frequency). We found  
275 no association between tail length and understory use ( $r = 0.44$ ,  $df = 10$ ,  $p = 0.15$ ),  
276 showing that these traits are complementary to described use of vertical stratum. For  
277 trophic guild, the small mammals captured species were assigned to a diet category  
278 representing a combination of feeding guilds, such as: frugivore-omnivore (*C. philander*  
279 and *D. albiventris*) and insectivore-omnivore (*C. chacoensis*, *G. agilis*, *M. murina* and  
280 *M. kungsi*); while rodents were classified as: frugivore-granivore (*C. expulsus*, *C. tener*  
281 and *O. mottogrossae*) and frugivore-seed predator (*O. bicolor*, *O. catherinae* and *R.*  
282 *macrurus*). Categories were based on Paglia et al. [41].

283 The marsupial species captured in our study belong to the family Didelphidae,  
284 and are distributed into two subfamilies: Caluromyinae (i.e., *C. philander*) and  
285 Didelphinae that can be sub-divided in three tribes: Marmosini (*M. murina* and *M.*  
286 *kungsi*), Didelphini (*D. albiventris*) and Thylamyini (*C. chacoensis* and *G. agilis*). The  
287 six rodent species comprised the suborder Myomorpha, family Cricetidae, subfamily  
288 Sigmodontinae, belonging to three tribes: Oryzomyini (*O. bicolor*, *O. catherinae* and *O.*  
289 *mottogrossae*), Phyllotini (*C. expulsus* and *C. tener*) and Thomasomyini (*R. macrurus*).  
290 The phylogenetic and functional relationships of the captured small mammal  
291 community can be found in Fig 1.

292

## 293 **Taxonomic $\beta$ -diversity**

294 The comparison of T $\beta$ D variation with our predictor variables showed consistent results  
295 when weighting the species richness ( $q = 0$ ) and Shannon entropy ( $q = 1$ ). We found  
296 evidence of geographical distance ( $q = 0$ :  $r = 0.38$ ,  $p = 0.008$  [13 sample units];  $q = 0$ :  $r$

297 = 0.32,  $p = 0.001$  [24 sample units];  $q = 1$ :  $r = 0.27$ ,  $p = 0.047$  [13 sample units];  $q = 1$ :  $r$   
298 = 0.34,  $p = 0.001$  [24 sample units]; Fig 2a and b) on the patterns of  $\beta$ -diversity (Table  
299 1). We have not found any other association with else predictor variables for these  $\beta$ -  
300 diversity metrics. For the  $\beta$ -diversity weighting the dominant species ( $q = 2$ ), we found  
301 that geographical distance ( $r = 0.27$ ,  $p = 0.042$  [13 sample units];  $r = 0.26$ ,  $p = 0.004$  [24  
302 sample units]; Table 1, Fig 2c), “no. of fallen logs” ( $r = 0.22$ ,  $p = 0.014$ ; Table 1; Fig  
303 2d) and “canopy cover” ( $r = 0.19$ ,  $p = 0.038$ ; Table 1, Fig 2e) were important predictors  
304 on determining the patterns of  $\beta$ -diversity turnover. Despite occurring all over the  
305 gradient, higher fallen logs frequency seems to determine the higher incidence of *C.*  
306 *tener*, *M. murina* and *R. macrurus*, and lower fallen logs frequency appears to  
307 associated to *G. agilis* and *C. philander* (S1 Fig). As for the canopy cover, most of the  
308 species were relatively abundant along the entire gradient, but some species like *M.*  
309 *kunsi*, *O. mattogrossae* and *C. philander* were exclusively found in grids with higher  
310 canopy cover, and *C. expulsus* was more frequently capture in low canopy cover sites  
311 (S2 Fig).

312

### 313 **Functional and phylogenetic $\beta$ -diversity**

314 The functional turnover represented by  $D_{kl}$  was positively associated with “no. of fallen  
315 logs”, “canopy cover” and “NDVI” ( $r = 0.15$ ,  $p = 0.030$ ;  $r = 0.18$ ,  $p = 0.004$ ;  $r = 0.25$ ,  $p$   
316 = 0.018, respectively; Table 1, Fig 3a-c). In the other hand, the standardized  $H$  was  
317 related only to geographical distance ( $r = 0.36$ ,  $p = 0.013$ ; Table 1, Fig 3d). Higher  
318 values of  $D_{kl}$  and  $H$  were associated with species like *O. mattogrossae*, *D. albiventris*,  
319 *C. chacoensis* and *O. bicolor*; species with a wide range of variation in their traits

320 related to use of habitat, tail length, and diet, which have determined such high values  
321 of functional diversity variation (S3 Fig).

322 The P $\beta$ D represented by MPD showed a positive association with geographical  
323 distance and “forest area” ( $r = 0.36$ ,  $p = 0.006$  [13 sample units];  $r = 0.34$ ,  $p = 0.001$  [24  
324 sample units];  $r = 0.42$ ,  $p = 0.017$ ; Table 1, Fig 4a and b). The effect of “forest area” is  
325 consistently significant even when accounting for the variability captured by the  
326 geographical disposition of the grids (Partial mantel,  $r = 0.31$ ,  $p = 0.04$ ). The MNTD  
327 showed significant associations with geographical distance and “canopy cover” ( $r =$   
328  $0.51$ ,  $p = 0.007$  [13 sample units];  $r = 0.46$ ,  $p = 0.001$  [24 sample units];  $r = 0.32$ ,  $p =$   
329  $0.030$ ; Table 1, Fig 4c and d). Marsupials, Marmosini tribe (*M. murina* and *M. kunsii*)  
330 and arboreal rodents, tribes Oryzomyini (*O. bicolor*) and Thomasomyini (*R. macrurus*)  
331 were more frequent in habitats with high “canopy cover” values (S2 Fig).

332

## 333 **Discussion**

### 334 **Overview**

335 Our findings revealed that *i*) small mammal communities sampled in this highly  
336 fragmented landscape Neotropical region were dominated by commonly found  
337 marsupials and rodent’s species with arboreal-scansorial habits. *ii*) In spite of being  
338 highly fragmented, our landscape presented a wide variation of habitat quality, mostly  
339 driven by vegetation structure, food resource and landscape attributes, which harbor  
340 functionally and phylogenetically diverse small mammal communities in central Brazil.  
341 *iii*) Geographical distance was the main variable correlated to all partitions and all

342 dimensions of  $\beta$ -diversity. Habitat quality gradient was an important predictor for T $\beta$ D  
343 (partition of dominant species), and F $\beta$ D and P $\beta$ D. We discuss below such findings in  
344 the light of dispersal limitation and environmental filters on driving the patterns of  $\beta$ -  
345 diversity in small mammals of Central Brazil.

346

## 347 **Taxonomic $\beta$ -diversity**

348 Geographical distance was positively correlated with all partitions of T $\beta$ D,  
349 corroborating our initial hypothesis. Marsupials and small rodents have a low dispersal  
350 ability [33,35,51,52] that limit the continuous replacement of small mammal species  
351 between distant localities. Further, small mammal communities in the Cerrado domain  
352 have been discussed elsewhere to be mainly driven by dispersal limitation and habitat  
353 selectivity [28,30]. Geographical distance also has been the most important predictor of  
354 small mammal dissimilarity in Atlantic Forest [52]. This finding can be explained by  
355 the idea that fragmented landscapes are hyper-dynamically influenced by environmental  
356 heterogeneity [12]. Small mammals are able to disperse between relatively closer  
357 fragments ( $\sim$  485 m in average, according to [55]), but homing behavior can be much  
358 higher for larger species like *Philander frenatus*, which crossed an area of 1050 m of  
359 fragmented landscape in the Atlantic Forest [56]. In our study, although the landscape is  
360 mainly composed by homogeneous semideciduous forest fragments, strong  
361 heterogeneity at small scales can be found between forest patches (e.g., vegetation  
362 structure). Such variability may reflect different levels of habitat quality, which  
363 certainly influence the potential source pools and species establishment for each patch  
364 with different degrees of isolation.



365           When weighting abundant species ( $q = 2$  Hill number), T $\beta$ D was also positively  
366 associated to habitat quality (e.g., fallen logs and canopy cover). We captured an  
367 expressive number of individuals in such highly fragmented landscape of central Brazil,  
368 within these only *C. philander*, *M. kunsii* and *O. mattogrossae* were rarely recorded in  
369 our study (1 to 2 individuals). On the other hand, 96% of the captured individuals -  
370 seven of the twelve captured species - occurred in 6 to 20 trapping grids. This finding  
371 may be caused by the variation in vegetation structure between different sampling sites,  
372 which by consequence determine abundance patterns for the most common species.  
373 Thus, the higher values of T $\beta$ D based on the abundance of species of small mammals  
374 can be resulted from the higher variability in small mammal community structure along  
375 this habitat quality gradient. In the Cerrado domain, the abundance (not richness) of  
376 small mammals is known to be correlated with different types of vegetation cover (e.g.,  
377 herbaceous, shrub, and tree density) [57], a variable that is commonly associated with  
378 habitat heterogeneity and complexity [58].

379

## 380 **Functional and phylogenetic $\beta$ -Diversity**

381 In overall terms, the small mammals communities sampled in our study is relatively  
382 species poor when compared to other communities of the same group in Central Brazil  
383 [59], a pattern that seems to related to the elevated habitat loss in the region. Large  
384 bodied rodents that are specialists in forested habitats (e.g., tribe Oryzomyini [*Hylaemys*  
385 *megacephalus*], Family Echimyidae, Eumysopinae [*Proechimys longicaudatus* and *P.*  
386 *roberti*]) generally represent the first functional group and respective phylogenetic  
387 lineages to disappear in highly fragmented landscapes [25,60]. Such group is intimately  
388 associated with continuous forests and landscapes with high percentual of vegetation

389 cover [25,27,39,60,61]. In the other hand, species of marsupials (e.g., *G. agilis* e *C.*  
390 *chacoensis*) and rodents (e.g., *C. expulsus* e *C. tener*) that have a broad ecological niche  
391 and are able to use both forested and open field environments, as present an  
392 opportunistic feeding habitat [29,60], commonly represent the species that are capable  
393 to be successful even in such disturbed environments. Small sized rodent species that  
394 use the understory (e.g., *O. bicolor* e *R. macrurus*) seems also to be weakly affected by  
395 habitat fragmentation in the region, perhaps the smaller scale of niche requirements of  
396 these species protected them of the negative effects of habitat fragmentation [29].  
397 However, despite high co-occurrence of such resistant species between forest fragments  
398 in the region, variation in abundance patterns are common for these species, which may  
399 be related to different niche requirements and responses to habitat modification [29].

400         Despite the relatively modest phylogenetic and functional variation of our  
401 sampled small mammals' communities, we found a turnover for these community  
402 dimensions in relation to geographical distance and habitat quality gradient (i.e., no.  
403 fallen logs and canopy cover). In the Amazonian habitat, F $\beta$ D and P $\beta$ D of bat  
404 communities were highest between continuous forest and *campinarana*, two highly  
405 contrasting environments, and these patterns in  $\beta$ -diversity were associated with  
406 functional richness and lineage richness differences, respectively [22]. An study with  
407 bird and ant assemblages, in Atlantic Forest and Pampas Grassland showed that land  
408 uses and biomes seems to promote assemblage differentiation in traits and lineages that  
409 occurred in anthropogenic habitats, further in this landscape both animal groups were  
410 similarly sensitive to changing in vegetation structure [63]. Therefore, habitat quality  
411 seems to be an important driver of functional and phylogenetic turnover in biological  
412 communities in the Neotropics independent of the biological group or sampled region.  
413 Nevertheless, understanding what are the most important traits and functional lineages

414 that readily respond to habitat disturbance, as what are the most resilient ones that  
415 persist in disturbed fragments, are of utmost importance for providing information for  
416 conservation initiatives.

417 Little is known about the dispersibility of small mammals among forest patches  
418 in the Neotropics [55]. Despite reasonable to expect, a positive relation between body  
419 size and dispersiveness is not always the rule for this group of mammals. For instance,  
420 the mid-bodied size nocturnal marsupial *P. frenatus* (400-600 g) has a relatively small  
421 living area (2.8 ha). Thus, even being a larger species for a small-mammal, the apparent  
422 inability of this species to occupy different types of habitats (e.g. less forested patches  
423 or open fields), may limit its dispersion to equivalent nearby fragments, letting this  
424 species susceptible to local extinctions [64], which may similarly be the case for other  
425 large bodied terrestrial small rodents that was expected to be reported in our study, but  
426 were not captured [e.g. *Cerradomys scotti*, *C. maracajuensis*, *C. marinhui*, *C.*  
427 *subflavus*, *P. longicaudatus*, *P. roberti* ]. The capacity of using the landscape matrix as  
428 a secondary habitat, confers more flexibility to overcome the negative effects of habitat  
429 fragmentation [65,66]. Therefore, the prevalence of mostly generalist's species that can  
430 occupy different portions of the landscape found here may explain the low F $\beta$ D e P $\beta$ D  
431 in the sampling region.

432

## 433 **Conclusion**

434 To the best of our knowledge, this is the first study that shows the effect of geographical  
435 distance, habitat and landscape variation on all partitions and dimensions of small  
436 mammals'  $\beta$ -diversity. Considering that we have a depleted small mammal community

437 due to high habitat loss in central Brazil, we conclude that only abundance-weighted  $\beta$ -  
438 diversity values responded to the predictors of habitat quality. In this sense, a  
439 homogeneous environment results in poor communities, where abundance was more  
440 important than richness, therefore, studies that seek to investigate the effect of habitat  
441 loss and fragmentation on biodiversity need to consider species abundance and not just  
442 species richness. Abundance was also a more important attribute than richness in anuran  
443 assemblages in Pantanal, a region naturally disturbed by floods in South America, since  
444 most species co-occurred in all sampled ponds but varied in their abundance [67]. Thus,  
445 we summarize that taxonomic, functional and phylogenetic replacement of the small  
446 mammal communities in the fragmented landscape of central Brazil is determined by  
447 dispersal limitation and habitat selection, driven by species-specific responses in the  
448 communities' arrangements.

449

## 450 **Acknowledgments**

451 We thank to the colleague of the Laboratory of Ecology and Biogeography of Mammals  
452 for field assistance.

## 453 **References**

- 454 1. Hamilton AJ. Species diversity or biodiversity? *J Environ Manage.*  
455 2005;75(1):89–92.
- 456 2. Sutherland WJ, Freckleton RP, Godfray HCJ, Beissinger SR, Benton T, Cameron  
457 DD, et al. Identification of 100 fundamental ecological questions. *J Ecol.*  
458 2013;101(1):58–67.
- 459 3. Whittaker RJ. Vegetation of the Siskiyou Mountains, Oregon and California.  
460 *Ecol Monogr.* 1960;30:279–338.
- 461 4. Lande R. Statistics and partitioning of species diversity and similarity among  
462 multiple communities. *Oikos.* 1996;76(1):5–13.
- 463 5. Jost L. Partitioning diversity into independent alpha and beta components.  
464 *Ecology.* 2007;88(10):2427–39.
- 465 6. Hill MO. Diversity and Evenness: A Unifying Notation and Its Consequences.  
466 *Ecology.* 1973;54(2):427–32.
- 467 7. Jost L. Entropy and diversity. *Oikos.* 2006;113:363–75.
- 468 8. Roswell M, Dushoff J, Winfree R. A conceptual guide to measuring species  
469 diversity. *Oikos.* 2021;130:321–38.
- 470 9. Socolar JB, Gilroy JJ, Kunin WE, Edwards DP. How Should Beta-Diversity  
471 Inform Biodiversity Conservation? *Trends Ecol Evol [Internet].* 2016;31(1):67–  
472 80. Available from: <http://dx.doi.org/10.1016/j.tree.2015.11.005>
- 473 10. Tscharntke T, Tylianakis JM, Rand TA, Didham RK, Fahrig L, Batáry P, et al.  
474 Landscape moderation of biodiversity patterns and processes - eight hypotheses.

- 475 Biol Rev. 2012;87(3):661–85.
- 476 11. Rybicki J, Abrego N, Ovaskainen O. Habitat fragmentation and species diversity  
477 in competitive species communities. bioRxiv. 2018;
- 478 12. Fahrig L. Ecological Responses to Habitat Fragmentation per Se. *Annu Rev Ecol*  
479 *Evol Syst.* 2017;48:1–23.
- 480 13. Fahrig L, Arroyo-Rodríguez V, Bennett JR, Boucher-Lalonde V, Cazetta E,  
481 Currie DJ, et al. Is habitat fragmentation bad for biodiversity? *Biol Conserv*  
482 [Internet]. 2019;230(September 2018):179–86. Available from:  
483 <https://doi.org/10.1016/j.biocon.2018.12.026>
- 484 14. Karp DS, Rominger AJ, Zook J, Ranganathan J, Ehrlich PR, Daily GC. Intensive  
485 agriculture erodes  $\beta$ -diversity at large scales. *Ecol Lett.* 2012;15(9):963–70.
- 486 15. Arroyo-Rodríguez V, Rös M, Escobar F, Melo FPL, Santos BA, Tabarelli M, et  
487 al. Plant  $\beta$ -diversity in fragmented rain forests: Testing floristic homogenization  
488 and differentiation hypotheses. *J Ecol.* 2013;101(6):1449–58.
- 489 16. Morante-Filho JC, Arroyo-Rodríguez V, Faria D. Patterns and predictors of  $\beta$ -  
490 diversity in the fragmented Brazilian Atlantic forest: A multiscale analysis of  
491 forest specialist and generalist birds. *J Anim Ecol.* 2016;85(1):240–50.
- 492 17. Santana J, Porto M, Reino L, Moreira F, Ribeiro PF, Santos JL, et al. Using beta  
493 diversity to inform agricultural policies and conservation actions on  
494 Mediterranean farmland. *J Appl Ecol.* 2017;54(6):1825–35.
- 495 18. Zhao Y, Sanders NJ, Liu J, Jin T, Zhou H, Lu R, et al.  $\beta$  Diversity Among Ant  
496 Communities on Fragmented Habitat Islands: the Roles of Species Trait,  
497 Phylogeny and Abundance. *Ecography (Cop).* 2021;1–11.

- 498 19. Moreno CE, Calderón-Patrón JM, Martín-Regalado N, Martínez-Falcón AP,  
499 Ortega-Martínez IJ, Rios-Díaz CL, et al. Measuring species diversity in the  
500 tropics: a review of methodological approaches and framework for future studies.  
501 *Biotropica*. 2018;50(6):929–41.
- 502 20. Pereira MJR, Fonseca C, Aguiar LMS. Loss of multiple dimensions of bat  
503 diversity under land-use intensification in the Brazilian Cerrado. *Hystrix, Ital J*  
504 *Mammal [Internet]*. 2018;29(2):25–32. Available from: [http://www.italian-](http://www.italian-journal-of-mammalogy.it)  
505 [journal-of-mammalogy.it](http://www.italian-journal-of-mammalogy.it)
- 506 21. Moreira LFB, de Castilhos HZ, Castroviejo-Fisher S. Something is not quite  
507 right: Effects of two land uses on anuran diversity in subtropical grasslands.  
508 *Biotropica*. 2020;52(6):1286–97.
- 509 22. Carvalho WD, Mustin K, Farneda FZ, de Castro IJ, Hiláro RR, Martins ACM, et  
510 al. Taxonomic, functional and phylogenetic bat diversity decrease from more to  
511 less complex natural habitats in the Amazon. *Oecologia*. 2021;(0123456789).
- 512 23. Sun J, Wen Z, Feijó A, Cheng J, Wang Y, Li S, et al. Elevation patterns and  
513 critical environmental drivers of the taxonomic, functional, and phylogenetic  
514 diversity of small mammals in a karst mountain area. *Ecol Evol*.  
515 2020;10(19):10899–911.
- 516 24. Cisneros LM, Fagan ME, Willig MR. Effects of human-modified landscapes on  
517 taxonomic, functional and phylogenetic dimensions of bat biodiversity. *Divers*  
518 *Distrib*. 2015;21(5):523–33.
- 519 25. Pardini R, De Souza SM, Braga-Neto R, Metzger JP. The role of forest structure,  
520 fragment size and corridors in maintaining small mammal abundance and  
521 diversity in an Atlantic forest landscape. *Biol Conserv*. 2005;124(2):253–66.

- 522 26. Pardini R, de Bueno AA, Gardner TA, Prado PI, Metzger JP. Beyond the  
523 fragmentation threshold hypothesis: Regime shifts in biodiversity across  
524 fragmented landscapes. *PLoS One*. 2010;5(10).
- 525 27. Melo GL, Sponchiado J, Cáceres NC, Fahrig L. Testing the habitat amount  
526 hypothesis for South American small mammals. *Biol Conserv* [Internet].  
527 2017;209:304–14. Available from:  
528 <http://dx.doi.org/10.1016/j.biocon.2017.02.031>
- 529 28. Hannibal W, Cunha NL Da, Figueiredo VV, Rossi RF, Cáceres NC, Ferreira VL.  
530 Multi-scale approach to disentangle the small mammal composition in a  
531 fragmented landscape in central Brazil. *J Mammal*. 2018;99(6):1455–64.
- 532 29. Hannibal W, Cunha NL da, Figueiredo VV, Teresa FB, Ferreira VL. Traits reveal  
533 how habitat-quality gradients structure small mammal communities in a  
534 fragmented tropical landscape. *Austral Ecol*. 2020;45(1):79–88.
- 535 30. Ribeiro R, Ricklefs RE, Marinho-Filho J. Partitioning beta diversity to unravel  
536 mechanisms underlying the distributions of nonvolant small mammals in Brazil's  
537 Cerrado. *J Mammal*. 2020;101(6):1438–50.
- 538 31. Palmeirim AF, Benchimol M, Carlos J, Vinícius M, Carlos V. Ecological  
539 correlates of mammal  $\beta$  - - diversity in Amazonian land-bridge islands : from  
540 small- - to large- - bodied species. 2018;1109–20.
- 541 32. Palmeirim AF, Farneda FZ, Vieira MV, Peres CA. Forest area predicts all  
542 dimensions of small mammal and lizard diversity in Amazonian insular forest  
543 fragments. *Landsc Ecol*. 2021;0123456789.
- 544 33. Bergallo H de G. Fatores determinantes do tamanho da área de vida em



- 545 mamíferos. *Ciência Cult.* 1990;42:1067–72.
- 546 34. Pires ADS, Fernandez FADS. Use of space by the marsupial *Micoureus*  
547 *demerarae* in small Atlantic Forest fragments in south-eastern Brazil. *J Trop*  
548 *Ecol.* 1999;15(3):279–90.
- 549 35. Cáceres NC, Prevedello JA, Loretto D. Uso do espaço por marsupiais: fatores  
550 influentes sobre a área de vida, seleção de habitat e movimentos. In: Cáceres NC,  
551 editor. *Os marsupiais do Brasil: Biologia, Ecologia e Evolução*. Campo Grande:  
552 UFMS; 2012. p. 325–44.
- 553 36. Dinerstein E, Olson D, Joshi A, Vynne C, Burgess ND, Wikramanayake E, et al.  
554 *An Ecoregion-Based Approach to Protecting Half the Terrestrial Realm*.  
555 *Bioscience.* 2017;67(6):534–45.
- 556 37. Alvares CA, Stape JL, Sentelhas PC, De Moraes Gonçalves JL, Sparovek G.  
557 Köppen’s climate classification map for Brazil. *Meteorol Zeitschrift*.  
558 2013;22(6):711–28.
- 559 38. Sikes RS, Mammalogists AC and UC of the AS and. 2016 Guidelines of the  
560 American Society of Mammalogists for the use of wild mammals in research and  
561 education. 2016;97(3):663–88.
- 562 39. Cáceres NC, Nápoli RP, Casella J, Hannibal W. Mammals in a fragmented  
563 savannah landscape in south-western Brazil. *J Nat Hist.* 2010;44(7–8):491–512.
- 564 40. Patton JL, Pardiñas UFJ, D’Elía G. *Mammals of South America, vol 2. Rodents*.  
565 Chicago: The University of Chicago Press; 2015. 1384 p.
- 566 41. Paglia AP, Fonseca GAB, Rylands B, Herrmann G, Aguiar LMS, Chiarello AG,  
567 et al. Lista anotada dos mamíferos do Brasil. Vol. 4, Occasional Papers in

- 568 Conservation Biology. 2012. 1–75 p.
- 569 42. Gardner AL. Mammals of South America, vol 1. Marsupials, Xenarthrans,  
570 Shrews, and Bats. 1st ed. Chicago: The University of Chicago Press; 2008. 669 p.
- 571 43. Swenson NG. Phylogenetic resolution and quantifying the phylogenetic diversity  
572 and dispersion of communities. PLoS One. 2009;4(2).
- 573 44. Li D, Trotta L, Marx HE, Allen JM, Sun M, Soltis DE, et al. For common  
574 community phylogenetic analyses, go ahead and use synthesis phylogenies.  
575 Ecology. 2019;100(9):1–15.
- 576 45. Rao CR. Diversity and dissimilarity coefficients: A unified approach. Theor  
577 Popul Biol. 1982;21(1):24–43.
- 578 46. Webb CO, Ackerly DD, McPeck MA, Donoghue MJ. Phylogenies and  
579 Communities Ecology. Annu Rev Ecol Syst. 2002;33:475–505.
- 580 47. Webb CO, Ackerly DD, Kembel SW. Phylocom: Software for the analysis of  
581 phylogenetic community structure and trait evolution. Bioinformatics.  
582 2008;24(18):2098–100.
- 583 48. R Core Team. R: A language and environment for statistical computing  
584 [Internet]. Vienna; 2021. Available from: <https://www.r-project.org/>
- 585 49. Naimi B, Hamm NAS, Groen TA, Skidmore AK, Toxopeus AG. Where is  
586 positional uncertainty a problem for species distribution modelling. Ecography  
587 (Cop). 2014;37:191–203.
- 588 50. Marcon E, Hérault B. entropart: An R Package to Measure and Partition  
589 Diversity. J Stat Softw. 2015;67(8):1–26.

- 590 51. Oksanen J, Blanchet FG, Friendly M, Legendre RKP, McGlenn D, Minchin PR,  
591 et al. vegan: Community Ecology Package. R package version 2.5-6 [Internet]. R  
592 Core Team. 2019. Available from: <https://cran.r-project.org/package=vegan>
- 593 52. Kembel SW, Cowan PD, Helmus MR, Cornwell WK, Morlon H, Ackerly DD, et  
594 al. Picante: R tools for integrating phylogenies and ecology. *Bioinformatics*.  
595 2010;26(11):1463–4.
- 596 53. Pires ADS, Fernandez FAS. Use of space by the marsupial *Micoureus demerarae*  
597 in small Atlantic Forest fragments in south-eastern Brazil. *J Trop Ecol*.  
598 1999;15:279–90.
- 599 54. Dambros C, Cáceres N, Baselga A. The prevalence of temperature and dispersal  
600 limitation as drivers of diversity in Neotropical small mammals. *Austral Ecol*.  
601 2021;(November).
- 602 55. Crouzeilles R, Lorini ML, Grelle CEV. Deslocamento na matriz para espécies da  
603 mata atlântica e a dificuldade da construção de perfis ecológicos. *Oecologia Aust*.  
604 2010;14(4):875–903.
- 605 56. Prevedello JA, Delciellos AC, Vieira M V. Homing behavior of *Philander*  
606 *frenatus* (Didelphimorphia, Didelphidae) across a fragmented landscape in the  
607 Atlantic Forest. *Mastozoología Neotrop*. 2009;16(2):475–80.
- 608 57. Furtado LO, Felicio GR, Lemos PR, Christianini A V., Martins M, Carmignotto  
609 AP. Winners and Losers: How Woody Encroachment Is Changing the Small  
610 Mammal Community Structure in a Neotropical Savanna. *Front Ecol Evol*.  
611 2021;9(December).
- 612 58. Hannibal W, Cáceres NC. Use of vertical space by small mammals in gallery

- 613 forest and woodland savannah in south-western Brazil. *Mammalia*.  
614 2010;74(3):247–55.
- 615 59. Figueiredo VV, da Cunha NL, de Morais AR, Terribile LC, Hannibal W. The  
616 importance of sampling methods and landscape variation on explaining small  
617 mammal communities in a Neotropical ecotone region. *Mammal Res*.  
618 2021;66(2):301–12.
- 619 60. Viveiros De Castro EB, Fernandez FAS. Determinants of differential extinction  
620 vulnerabilities of small mammals in Atlantic forest fragments in Brazil. *Biol*  
621 *Conserv*. 2004;119(1):73–80.
- 622 61. Lambert TD, Malcolm JR, Zimmerman BL. Amazonian small mammal  
623 abundances in relation to habitat structure and resource abundance. *J Mammal*.  
624 2006;87(4):766–76.
- 625 62. Parreira Claro HW, Hannibal W. Diet of small mammals in semi-deciduous  
626 forest fragments in Central Brazil. *Austral Ecol*. 2022;1–5.
- 627 63. Corbelli JM, Zurita GA, Filloy J, Galvis JP, Vespa NI, Bellocq I. Integrating  
628 taxonomic, functional and phylogenetic beta diversities: Interactive effects with  
629 the biome and land use across taxa. *PLoS One*. 2015;10(5):1–17.
- 630 64. Hatfield JH, Orme CDL, Banks-Leite C. Using functional connectivity to predict  
631 potential meta-population sizes in the Brazilian Atlantic Forest. *Perspect Ecol*  
632 *Conserv*. 2018;16(4):215–20.
- 633 65. Prevedello JA, Vieira M V. Does the type of matrix matter? A quantitative  
634 review of the evidence. *Biodivers Conserv*. 2010;19(5):1205–23.
- 635 66. Grilo C, Molina-Vacas G, Fernández-Aguilar X, Rodríguez-Ruiz J, Ramiro V,

- 636 Porto-Peter F, et al. Species-specific movement traits and specialization  
637 determine the spatial responses of small mammals towards roads. *Landsc Urban*  
638 *Plan* [Internet]. 2018;169(July 2017):199–207. Available from:  
639 <http://dx.doi.org/10.1016/j.landurbplan.2017.09.014>
- 640 67. Delatorre M, Cunha N, Raizer J, Ferreira VL. Evidence of stochasticity driving  
641 anuran metacommunity structure in the Pantanal wetlands. *Freshw Biol.*  
642 2015;60(11):2197–207.

644 Figures.

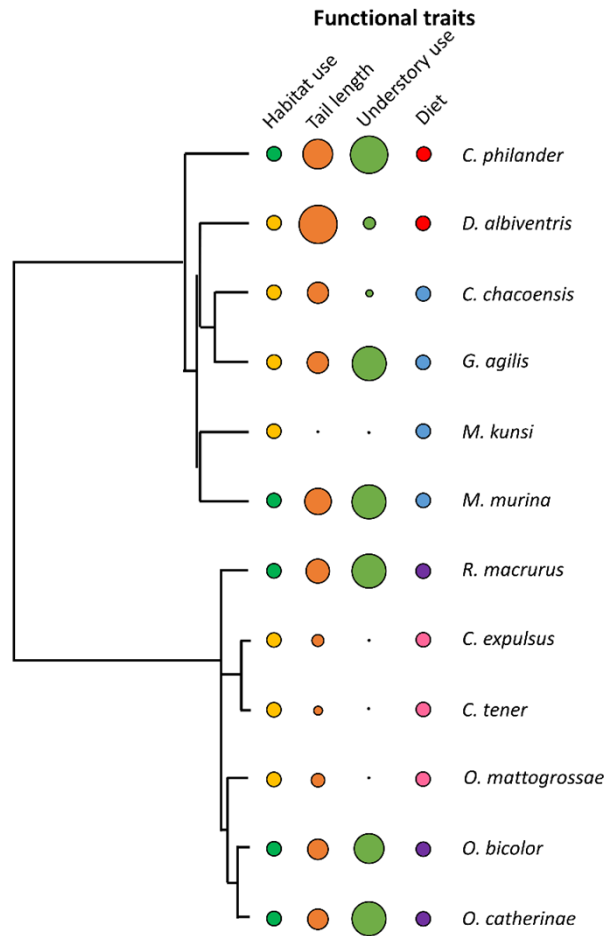

645

646 **Fig 1: Phylogenetic hypothesis derived from the “VertLife.org phylogeny subset**  
 647 **on-line tool”**, using as backbone the "Mammal’s birth-death node-dated completed  
 648 trees [all 5911 species, set of 10k trees]" and the functional traits used in our study:  
 649 habitat use [nominal trait: generalist [orange circle] or forest specialist [green circle]],  
 650 tail length [quantitative trait ranging from 31.6 to 297.8 mm], use of vertical strata  
 651 [quantitative trait ranging from 0 to 100% and diet [multi-choice: frugivore-omnivore  
 652 [red circle], insectivore-omnivore [blue circle], frugivore-granivore [pink circle] and  
 653 frugivore-seed predator [purple circle]], based on relative capture success in traps set in  
 654 the understory] [see, Hannibal et al. 2020 for functional traits interpretation details].

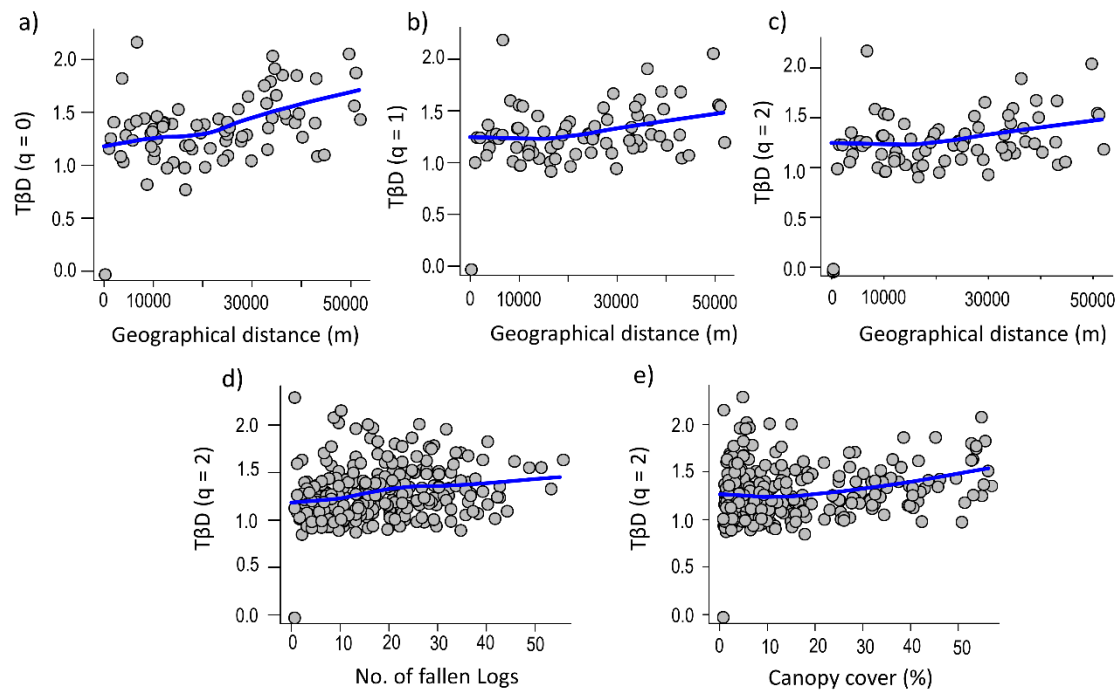

655

656 **Fig 2. Correlation between small mammal taxonomic  $\beta$ -diversity and geographical**  
657 **distance [a-c], no. of fallen logs [d] and canopy cover [e] in a highly fragmented**  
658 **landscape in central Brazil.** The Hill numbers associated represent rare [ $q = 0$ ],  
659 common [ $q = 1$ ] and abundant [ $q = 2$ ] species, respectively. The tendency line is fitted  
660 using Locally Estimated Scatterplot Smoothing [LOESS].

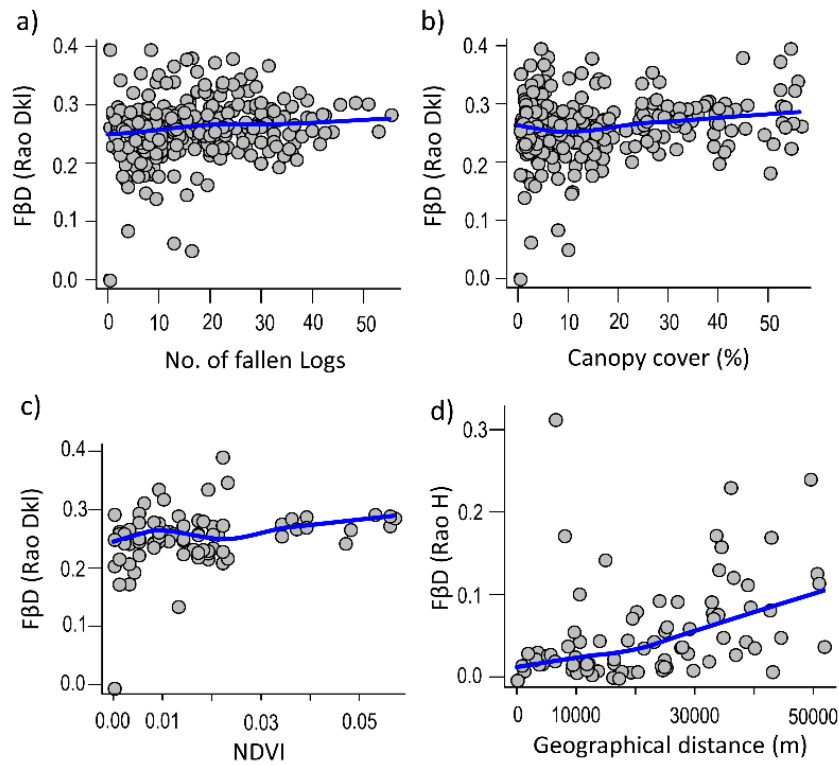

661

662 **Fig 3. Correlation between small mammal functional  $\beta$ -diversity and no. of fallen**  
663 **logs [a], canopy cover [b], NDVI [c] and geographical distance [e] in a highly**  
664 **fragmented landscape in central Brazil. The tendency line is fitted using Locally**  
665 **Estimated Scatterplot Smoothing [LOESS].**



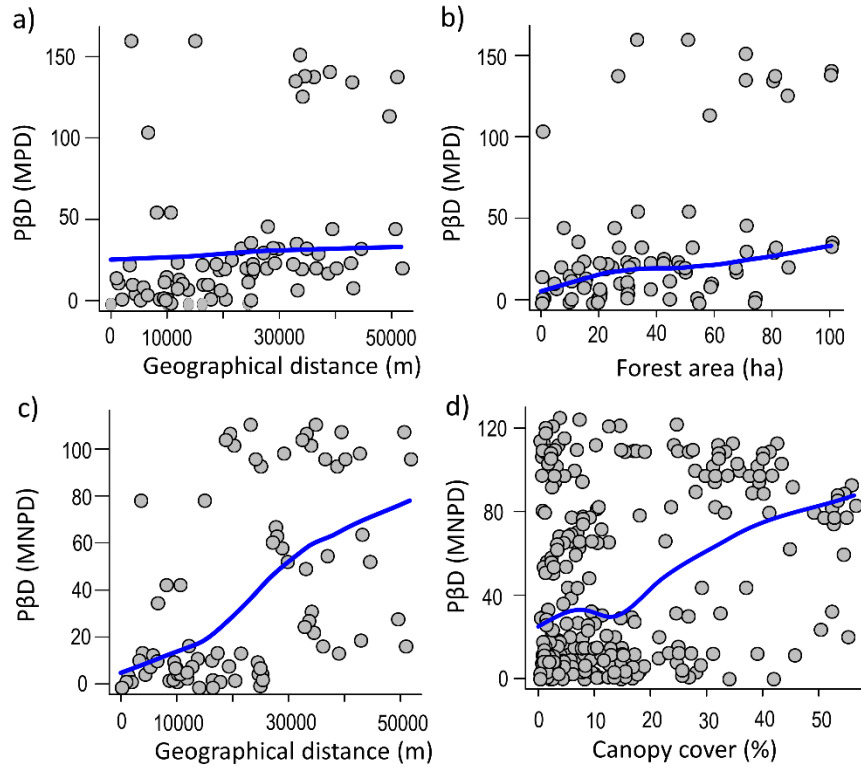

666

667 **Fig 4. Correlation between small mammal phylogenetic  $\beta$ -diversity and**  
668 **geographical distance [a and c], forest area [b] and canopy cover [d] in a highly**  
669 **fragmented landscape in central Brazil. The tendency line is fitted using Locally**  
670 **Estimated Scatterplot Smoothing [LOESS].**

671 Table.

672 **Table 1. Pearson correlation between geographical distance, habitat**  
 673 **characterization [vegetation structure and food resource availability] and**  
 674 **landscape characterization [patch and landscape metrics] with taxonomic,**  
 675 **functional and phylogenetic small mammal  $\beta$ -diversity. The significance of the**  
 676 **relation was tested via Mantel-tests.**

|                                                | Taxonomic [Hill numbers] |        |        | Functional Rao |        | Phylogenetic |        |
|------------------------------------------------|--------------------------|--------|--------|----------------|--------|--------------|--------|
|                                                | q = 0                    | q = 1  | q = 2  | Dkl            | H      | MPD          | MNTD   |
| <b>Geographical distance [13 sample units]</b> | 0.38*                    | 0.27*  | 0.27*  | 0.19           | 0.36*  | 0.36*        | 0.51*  |
| <b>Geographical distance [24 sample units]</b> | 0.32**                   | 0.34** | 0.26** | 0.19*          | 0.36** | 0.34**       | 0.46** |
| <b>Vegetation structure</b>                    |                          |        |        |                |        |              |        |
| <b>No. shrubs</b>                              | -0.15                    | -0.08  | -0.02  | 0.07           | 0.01   | -0.06        | -0.05  |
| <b>No. lianas</b>                              | -0.06                    | -0.05  | -0.02  | -0.02          | -0.12  | 0.00         | -0.12  |
| <b>No. fallen logs</b>                         | -0.08                    | 0.13   | 0.22*  | 0.15*          | 0.05   | -0.08        | 0.02   |
| <b>Canopy cover</b>                            | 0.01                     | 0.15   | 0.19*  | 0.18**         | 0.15   | -0.06        | 0.32*  |
| <b>Litter cover</b>                            | -0.06                    | -0.02  | -0.01  | 0.01           | -0.03  | 0.06         | 0.17   |
| <b>Food resource availability</b>              |                          |        |        |                |        |              |        |
| <b>PCoA Arthro1</b>                            | -0.05                    | -0.04  | -0.03  | -0.04          | -0.02  | 0            | 0.12   |
| <b>PCoA Arthro2</b>                            | -0.04                    | -0.09  | -0.06  | 0.03           | -0.08  | -0.07        | -0.13  |
| <b>PCoA Fruit1</b>                             | -0.03                    | 0.00   | -0.02  | -0.04          | -0.05  | -0.04        | -0.07  |
| <b>Patch metrics</b>                           |                          |        |        |                |        |              |        |
| <b>Forest area</b>                             | 0.17                     | 0.06   | 0.09   | -0.14          | 0.23   | 0.42*        | 0.16   |
| <b>Perimeter</b>                               | 0.08                     | 0.09   | 0.05   | 0.04           | -0.13  | -0.13        | -0.11  |
| <b>NDVI</b>                                    | -0.06                    | 0.13   | 0.13   | 0.25*          | 0.18   | -0.00        | 0.39   |

**Landscape metrics**

|                       |       |       |       |       |       |       |       |
|-----------------------|-------|-------|-------|-------|-------|-------|-------|
| <b>Isolation</b>      | -0.22 | -0.25 | -0.25 | -0.16 | -0.14 | -0.15 | -0.09 |
| <b>Water distance</b> | -0.19 | -0.29 | -0.29 | -0.13 | -0.19 | -0.17 | -0.10 |
| <b>Total edge</b>     | 0.05  | 0.01  | 0.01  | 0.07  | -0.07 | -0.10 | -0.12 |
| <b>Connectivity</b>   | 0.05  | 0.02  | 0.02  | -0.05 | -0.02 | 0.01  | 0.04  |

677 Significant p-value = \*<0.05, \*\*<0.01

---

678

## 679 **Supporting Information**

680 **S1 Table. VIFs of the remained variables after stepwise procedure, based on 23**  
681 **variables that characterized habitat and landscape scales.**

| Variables                                                                          | VIF   |
|------------------------------------------------------------------------------------|-------|
| No. shrubs                                                                         | 3.196 |
| No. lianas                                                                         | 2.673 |
| No. fallen logs                                                                    | 3.750 |
| Canopy cover                                                                       | 2.594 |
| Litter cover                                                                       | 2.741 |
| PCoA Arthro1: Arthropods resources according to axis 1 of PCoA                     | 2.464 |
| PCoA Arthro2: Arthropods resources according to axis 2 of PCoA                     | 3.561 |
| PCoA Fruit-Seed1: Fruit-seed resources according to axis 1 of PCoA                 | 2.620 |
| Forest area of patch [ha]                                                          | 3.184 |
| Perimeter of focal patch [m]                                                       | 8.916 |
| NDVI                                                                               | 3.557 |
| Isolation: mean isolation of the five nearest patches [m]                          | 1.957 |
| Water distance: distance to water course [m]                                       | 3.780 |
| Total edge in the landscape [m]                                                    | 5.172 |
| Connectivity [connected <i>versus</i> isolated patch, considering riparian forest] | 4.424 |

682

683

684 **S2 Table. Habitat, patch and landscape metrics that characterization fragmented**  
 685 **landscape studied.**

| Parameter        | Type of parameter    | Description                                    | Range      | Mean ± SD     |
|------------------|----------------------|------------------------------------------------|------------|---------------|
| No. shrubs       | Vegetation structure | Number of shrubs in trapping-grid              | 62-1027    | 228.60±193.01 |
| No. lianas       | Vegetation structure | Number of lianas in trapping-grid              | 86-418     | 224.27±80.04  |
| No. fallen logs  | Vegetation structure | Number of fallen logs in trapping-grid         | 3-58       | 33.63±14.41   |
| Canopy cover     | Vegetation structure | Canopy cover in trapping-grid                  | 41-98%     | 85.92±14.70   |
| Litter cover     | Vegetation structure | Litter cover in trapping-grid                  | 85-99%     | 95.55±3.32    |
| PCoA Arthro1     | Food resource        | PCoA axis 1 of arthropods in trapping-grid     | -          | -             |
| PCoA Arthro2     | Food resource        | PCoA axis 2 of arthropods in trapping-grid     | -          | -             |
| PCoA Fruit-Seed1 | Food resource        | PCoA axis 1 of fruit and seed in trapping-grid | -          | -             |
| PCoA Fruit-Seed2 | Food resource        | PCoA axis 2 of fruit and seed in trapping-grid | -          | -             |
| Forest area      | Patch metric         | Total area of sampled patch [ha]               | 39.6-142.3 | 81.52±36.23   |
| Perimeter        | Patch metric         | Perimeter of sampled patch [m]                 | 2749-21136 | 6189.2±4733.7 |
| NDVI             | Patch metric         | Normalized difference vegetation index         | 0.28-0.33  | 0.32 ±0.01    |

|            |           |                              |              |                 |
|------------|-----------|------------------------------|--------------|-----------------|
| Isolation  | Landscape | Mean distance of the 4       | 99-4102      | 1603.1±1311.5   |
|            | metric    | nearest patches [m]          |              |                 |
| Water      | Landscape | Distance of trapping grid to | 171.6-1258.4 | 628.7±344.7     |
| distance   | metric    | water course [m]             |              |                 |
| Total edge | Landscape | Total edge measured in the   | 6410-60766   | 23679.9±15560.5 |
|            | metric    | landscape [m]                |              |                 |

---

686

687

688 **S3 Table. Correlation between predictors variables and spatial distribution of the**  
689 **sampled forest patches.**

| Group            | Method  | Statistic | N   | P.value |
|------------------|---------|-----------|-----|---------|
| No. shrubs       | Pearson | 0.0666    | 276 | 0.315   |
| No. lianas       | Pearson | -0.0088   | 276 | 0.509   |
| No. fallen logs  | Pearson | 0.0312    | 276 | 0.317   |
| Canopy cover     | Pearson | 0.0759    | 276 | 0.205   |
| Litter cover     | Pearson | 0.0167    | 276 | 0.401   |
| PCoA Arthro1     | Pearson | 0.0229    | 276 | 0.292   |
| PCoA Arthro2     | Pearson | -0.1020   | 276 | 0.837   |
| PCoA Fruit-Seed1 | Pearson | -0.0567   | 276 | 0.752   |
| Forest area      | Pearson | 0.4495    | 78  | 0.007*  |
| Perimeter        | Pearson | -0.1249   | 78  | 0.745   |
| NDVI             | Pearson | -0.0000   | 78  | 0.458   |
| Isolation        | Pearson | -0.0210   | 78  | 0.502   |
| Water distance   | Pearson | -0.0370   | 78  | 0.572   |
| Total edge       | Pearson | -0.0896   | 78  | 0.721   |
| Connectivity     | Pearson | -0.0836   | 78  | 0.831   |

690

691

692 Supporting Information:

693 Figures:

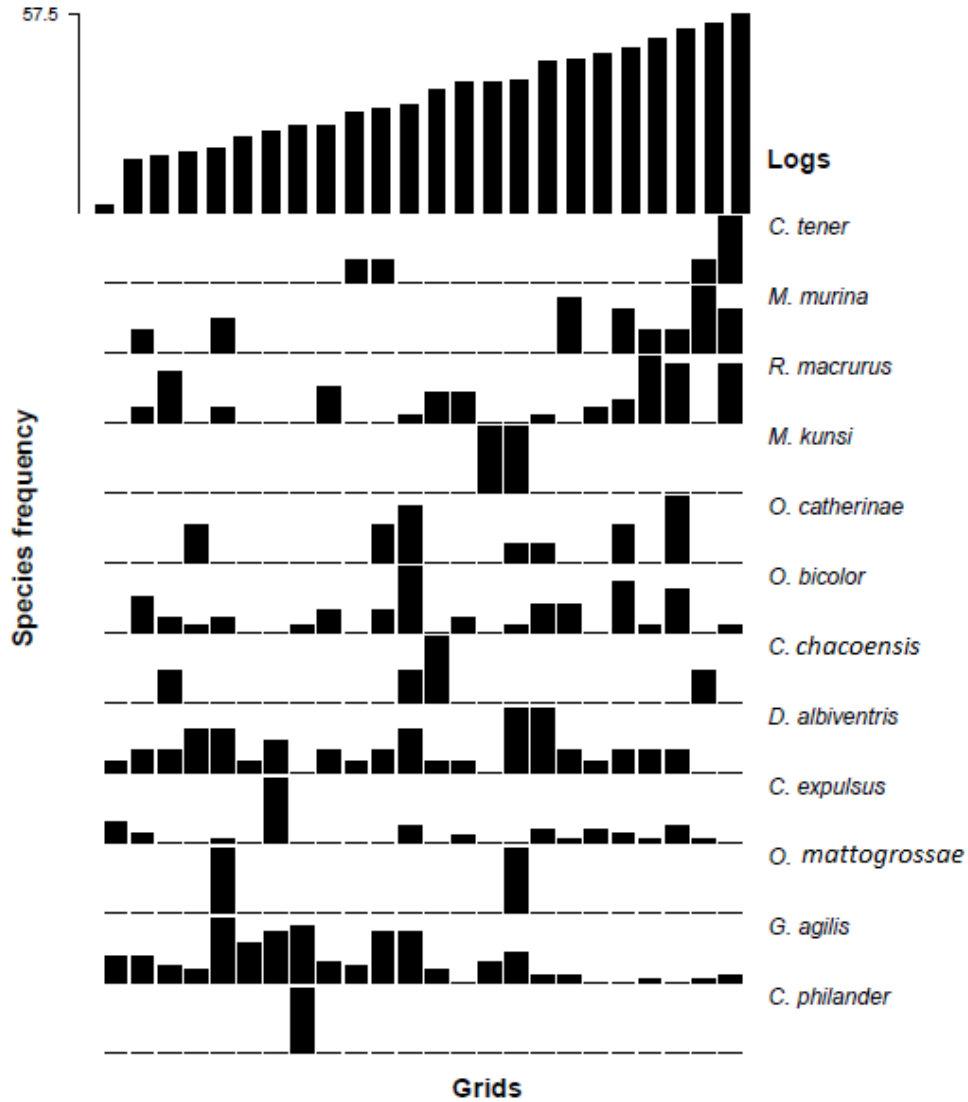

694

695 **S1 Fig. Direct ordination of small mammal species' frequency associated with no.**

696 **of fallen logs in fragmented landscape studied.**

697

698



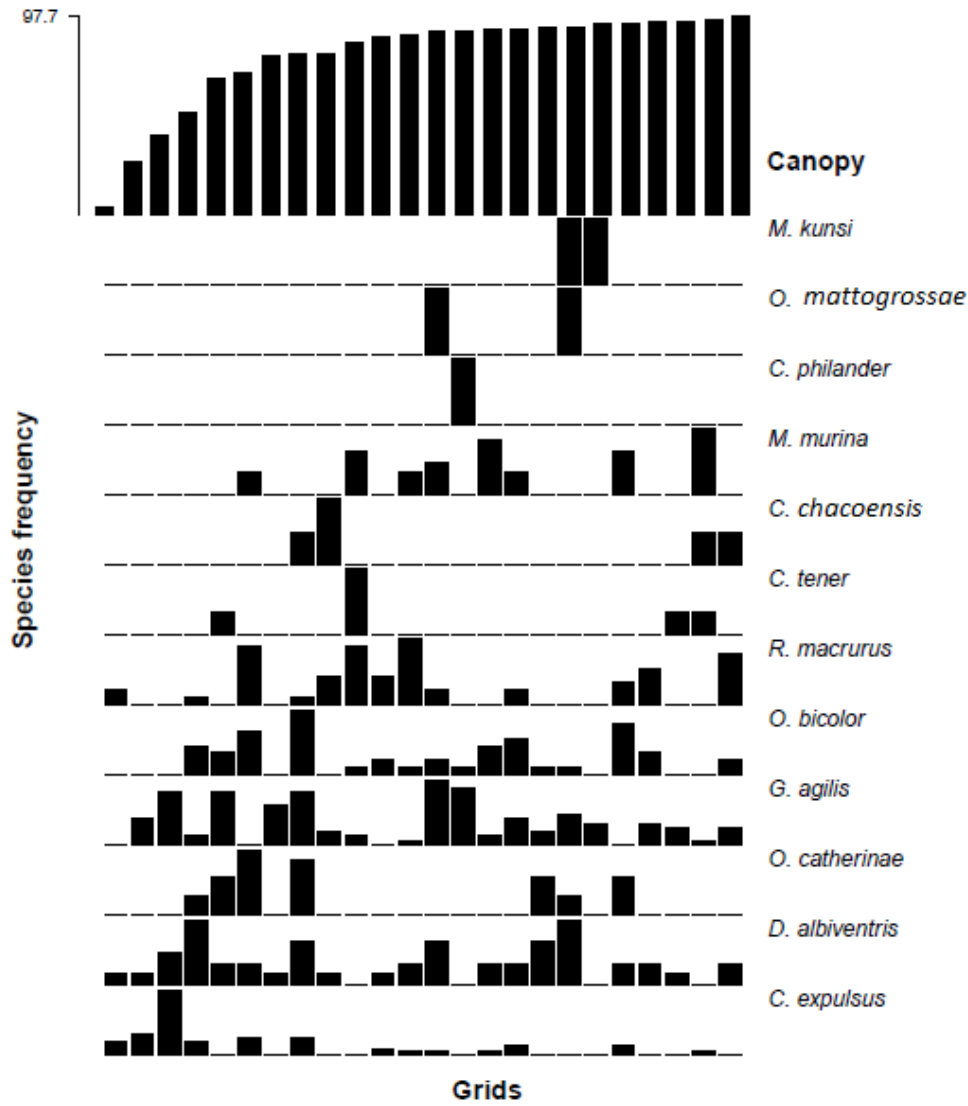

699

700 **S2 Fig. Direct ordination of small mammal species' frequency associated with**  
701 **canopy cover in fragmented landscape studied.**

702

703

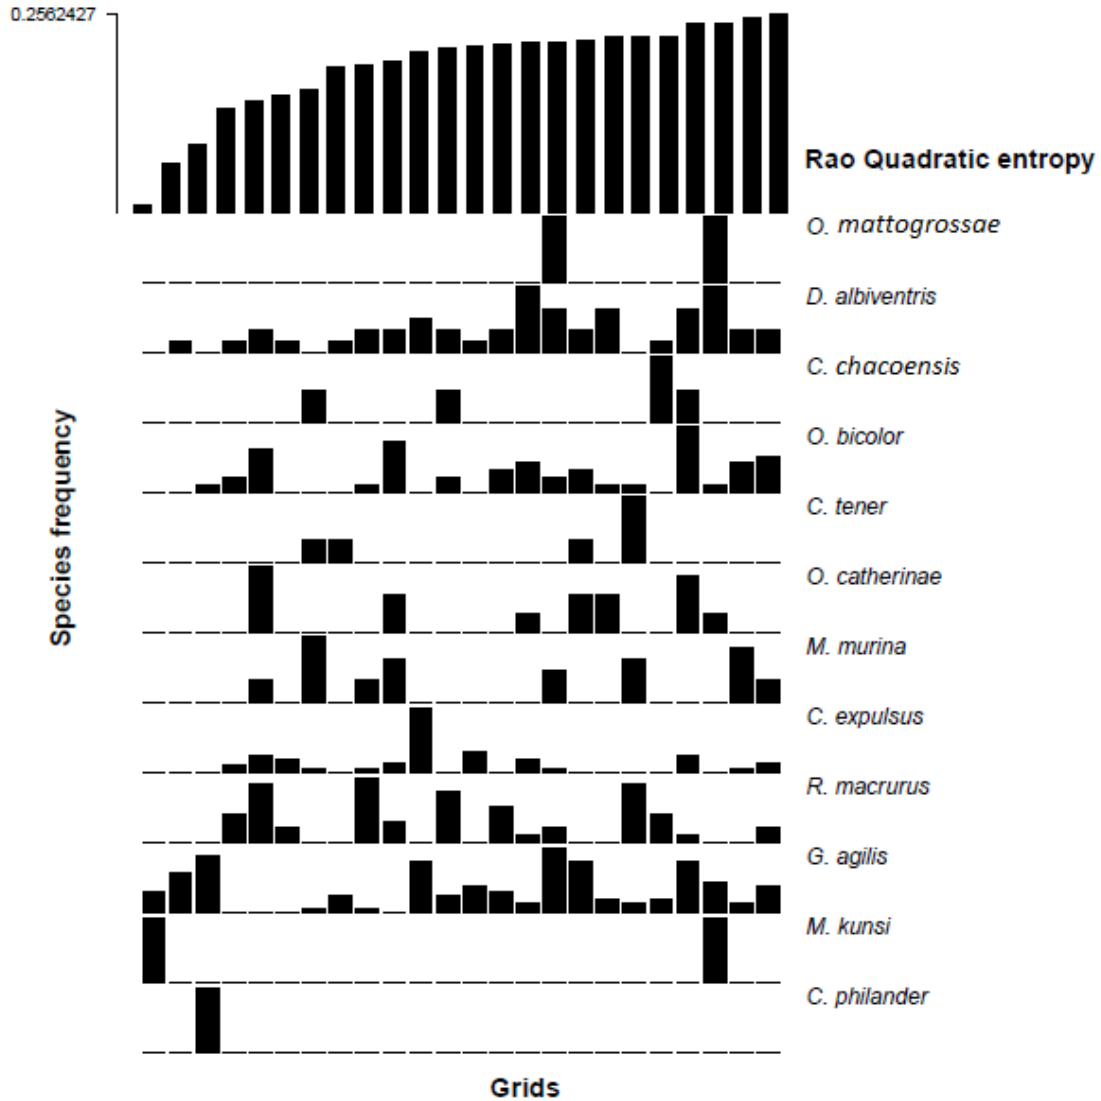

704

705 **S3 Fig. Direct ordination of small mammal species' frequency associated with Rao**

706 **Quadratic Entropy in fragmented landscape studied.**

707
